# Supplementary material for: Comparative analysis on genome-wide DNA methylation in longissimus dorsi muscle between Small Tailed Han and Dorper×Small Tailed Han crossbred sheep
Source: PubMed Central journal article supplement — Asian-Australas J Anim Sci. 2017 Jun 27;30(11):1529–39. doi: 10.5713/ajas.17.0154 (PMC5666187; doi:10.5713/ajas.17.0154), 2017-06-27
Supplement: ajas-30-11-1529-supplementary.pdf [file ajas-30-11-1529-supplementary.pdf]

**Table S1.** Summary of peaks

| #samples | Num Peaks | Peaks Mean length | Peaks Median length | Peaks total length | Percentage of genomic length (%) |
|----------|-----------|-------------------|---------------------|--------------------|----------------------------------|
| C13      | 110078    | 889.99            | 811                 | 97968717           | 3.79                             |
| C14      | 86559     | 842.18            | 770                 | 72898425           | 2.82                             |
| C7       | 121547    | 934.48            | 848                 | 113583757          | 4.39                             |
| T10      | 93952     | 952.09            | 863                 | 89450530           | 3.46                             |
| T5       | 116902    | 886.02            | 801                 | 103577748          | 4                                |
| T8       | 105347    | 820.29            | 744                 | 86415400           | 3.34                             |
| Merged   | 213392    | 1011.67           | 905                 | 215883291          | 8.34                             |

**Table S2.** Primers for BSP validation.

| MDR                     | Gene    | Forward(F)/Reverse(R) | Primer sequence            |
|-------------------------|---------|-----------------------|----------------------------|
| chr7:84219421-84219679  | TGFB3   | F                     | GAAATGGGTTCGGGTTAAT        |
|                         |         | R                     | ATATATAACGCCGAAAACCT       |
| chr19:42869604-42870470 | ACOX2   | F                     | AGTTAGGTAGTGGGTGTAGGTTGTG  |
|                         |         | R                     | CCCCCTACAACCTATATAATCCTTC  |
| chr26:13938540-13939276 | ACSL1   | F                     | ATTATTTGAGGGGAGGTGATTTTAG  |
|                         |         | R                     | ATACAACCTCAACTTTTAACTTTCAC |
| chr13:38607690-38608423 | RIN2    | F                     | TTTTTTTTTTGGAATTTGGGT      |
|                         |         | R                     | AATCACTTTATCCCAATTCCAC     |
| chr21:25146996-25148088 | ZDHHC13 | F                     | TGTTTTAAATGTTGAATGATTGTA   |
|                         |         | R                     | ATCACAAAACAACAAAAACAAC     |

**Table S3.** List of primers for real-time quantitative PCR

| Gene name       | Forward primer         | Reverse primer         |
|-----------------|------------------------|------------------------|
| TGFB3           | GCCACAGTCAGAGGAAGAAG   | CCTGTCGGAAGTCAATGTAGAG |
| ACSL1           | CGGAGGAGATTGTGGCTTAG   | TGAGCGTGTTGGTTGGAAG    |
| RYR1            | GGTGCTGGATGTGCTATGT    | AGTGATGAGGTCTTGGTTGG   |
| ACOX2           | GCGCTTGGCTGTTATGATGG   | TCATAGGCAGGGTTCCCCTC   |
| PPARG2          | GCTGTGGAGTAATTCGCTGTC  | CTACCTGCCGTGTCGCTAG    |
| NTN1            | TGCCCTTTCAGTTCTACTCC   | CTCCTGCTCGTTCTGTTTG    |
| RIN2            | CCTGATTGGTGTCTCCTGTTC  | CTCCTGCTCCTTGCTGTTG    |
| MAPRE1          | CTCTGAACAAACCGAAGAAACC | CTGCCTCGTCATCTCCATTC   |
| ADAMTS2         | TCTCAATACTTCCAGCACCA   | TTTTGTAGGGCACATCCAC    |
| MYOM1           | TATGCTTCCGTTGTGGTAAA   | ATTGTCTCGCCTTCTCTCC    |
| ZDHHC13         | TCCTGAACAATCTTAGCCAAC  | TACCACACTTTCTCCATAATCG |
| SH3PHD2B        | GATGAAATGAACCTGGAGAGA  | TCTTTGCCCTGATACCTGA    |
| $\beta$ -action | CCCTGGAGAAGAGCTACGAG   | GGTAGTTTCGTGAATGCCGC   |
